# Supplementary material for: Targeted sequencing of BRCA1 and BRCA2 across a large unselected breast cancer cohort suggests that one-third of mutations are somatic
Source: PubMed Central journal article supplement — Ann Oncol. 2016 May 18;27(8):1532–8. doi: 10.1093/annonc/mdw209 (PMC4959927; doi:10.1093/annonc/mdw209), 2016-05-18
Supplement: supp_mdw209_mdw209supp_fig1.pdf [file supp_mdw209_mdw209supp_fig1.pdf]

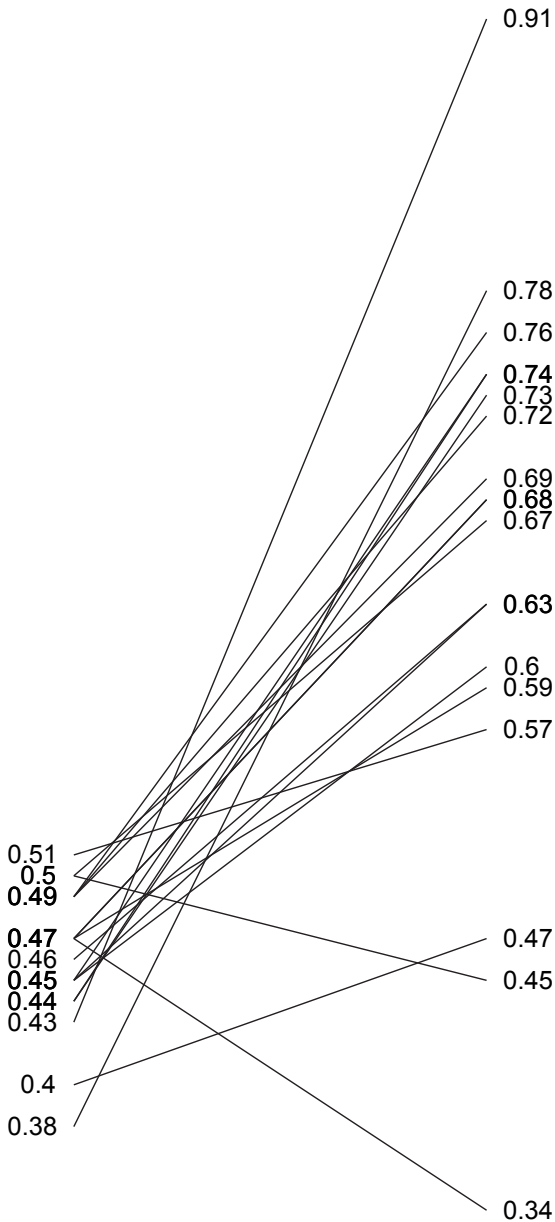

**Mutant allele frequency  
in normal sample**

**Mutant allele frequency  
in tumor sample**

**Figure S1.** Mutant allele frequencies of *BRCA1/2* germline mutations in tumor and matched normal sample of carrier patients. The plot shows the allele frequency of all 19 germline SNV and indel variants in normal tissue (left) and matched (line) tumor tissue (right). Each line represents a germline variant of a carrier patient. Patients with only somatic mutations are not shown. Consistent with a loss of the wildtype allele in the tumor sample, in most cases the mutated alleles were present in higher frequency in the tumor than in the normal sample.
